# Supplementary material for: Alignment of axial anisotropy of a mononuclear hexa-coordinated Co(ii) complex in a lattice shows improved single molecule magnetic behavior over a 2D coordination polymer having a similar ligand field
Source: Royal Society of Chemistry journal article supplement (doi:10.1039/d0dt04065g), 2021-01-01
Supplement: d0dt04065g1.pdf [file d0dt04065g1.pdf]

## Alignment of axial anisotropy of a mononuclear hexa-coordinated Co(II) complex in lattice shows improved single molecule magnet behavior over a 2D coordination polymer having similar ligand field

Ajit Kumar Kharwar, Arpan Mondal and Sanjit Konar

Department of Chemistry, Indian Institute of Science Education and Research Bhopal, Bhopal Bypass road, Bhauri, Bhopal-462066, MP, India.

**Table S1.** Crystal data and structure refinement for complexes **1** and **2**

|                                             |                                                                                   |                                                                   |
|---------------------------------------------|-----------------------------------------------------------------------------------|-------------------------------------------------------------------|
| Identification code                         | <b>1</b>                                                                          | 2016192                                                           |
| Empirical formula                           | C <sub>23</sub> H <sub>20</sub> Co <sub>0.5</sub> N <sub>5</sub> O <sub>2</sub> S | C <sub>46</sub> H <sub>42</sub> CoN <sub>14</sub> OS <sub>2</sub> |
| Formula weight                              | 459.96                                                                            | 929.98                                                            |
| Temperature/K                               | 140.0                                                                             | 140.0                                                             |
| Crystal system                              | triclinic                                                                         | monoclinic                                                        |
| Space group                                 | P-1                                                                               | P2 <sub>1</sub> /c                                                |
| a/Å                                         | 8.3970(4)                                                                         | 20.7532(14)                                                       |
| b/Å                                         | 8.8505(5)                                                                         | 11.7938(10)                                                       |
| c/Å                                         | 14.8758(8)                                                                        | 19.5101(14)                                                       |
| α/°                                         | 85.880(2)                                                                         | 90                                                                |
| β/°                                         | 86.441(2)                                                                         | 109.048(2)                                                        |
| γ/°                                         | 74.570(2)                                                                         | 90                                                                |
| Volume/Å <sup>3</sup>                       | 1061.87(10)                                                                       | 4513.8(6)                                                         |
| Z                                           | 2                                                                                 | 4                                                                 |
| ρ <sub>calc</sub> /cm <sup>3</sup>          | 1.439                                                                             | 1.368                                                             |
| μ/mm <sup>-1</sup>                          | 0.561                                                                             | 0.526                                                             |
| F(000)                                      | 477.0                                                                             | 1932.0                                                            |
| Crystal size/mm <sup>3</sup>                | 0.92 × 0.71 × 0.56                                                                | 0.72 × 0.61 × 0.47                                                |
| Radiation                                   | MoKα (λ = 0.71073)                                                                | MoKα (λ = 0.71073)                                                |
| 2θ range for data collection/°              | 4.782 to 57.574                                                                   | 4.91 to 50.216                                                    |
| Index ranges                                | -11 ≤ h ≤ 11, -11 ≤ k ≤ 11, -20 ≤ l ≤ 20                                          | -24 ≤ h ≤ 24, -14 ≤ k ≤ 14, -23 ≤ l ≤ 22                          |
| Reflections collected                       | 39242                                                                             | 37628                                                             |
| Independent reflections                     | 5526 [R <sub>int</sub> = 0.0415, R <sub>sigma</sub> = 0.0262]                     | 7995 [R <sub>int</sub> = 0.0691, R <sub>sigma</sub> = 0.0579]     |
| Data/restraints/parameters                  | 5526/0/288                                                                        | 7995/0/594                                                        |
| Goodness-of-fit on F <sup>2</sup>           | 1.039                                                                             | 1.130                                                             |
| Final R indexes [I >= 2σ (I)]               | R <sub>1</sub> = 0.0319, wR <sub>2</sub> = 0.0687                                 | R <sub>1</sub> = 0.0607, wR <sub>2</sub> = 0.1198                 |
| Final R indexes [all data]                  | R <sub>1</sub> = 0.0417, wR <sub>2</sub> = 0.0727                                 | R <sub>1</sub> = 0.0900, wR <sub>2</sub> = 0.1300                 |
| Largest diff. peak/hole / e Å <sup>-3</sup> | 0.32/-0.36                                                                        | 0.70/-0.57                                                        |

<sup>a</sup>R<sub>1</sub> = Σ||F<sub>o</sub>| - |F<sub>c</sub>||/Σ|F<sub>o</sub>|. <sup>b</sup>wR<sub>2</sub> = [Σw(F<sub>o</sub><sup>2</sup> - F<sub>c</sub><sup>2</sup>)/(F<sub>o</sub><sup>2</sup>)<sup>1/2</sup>]

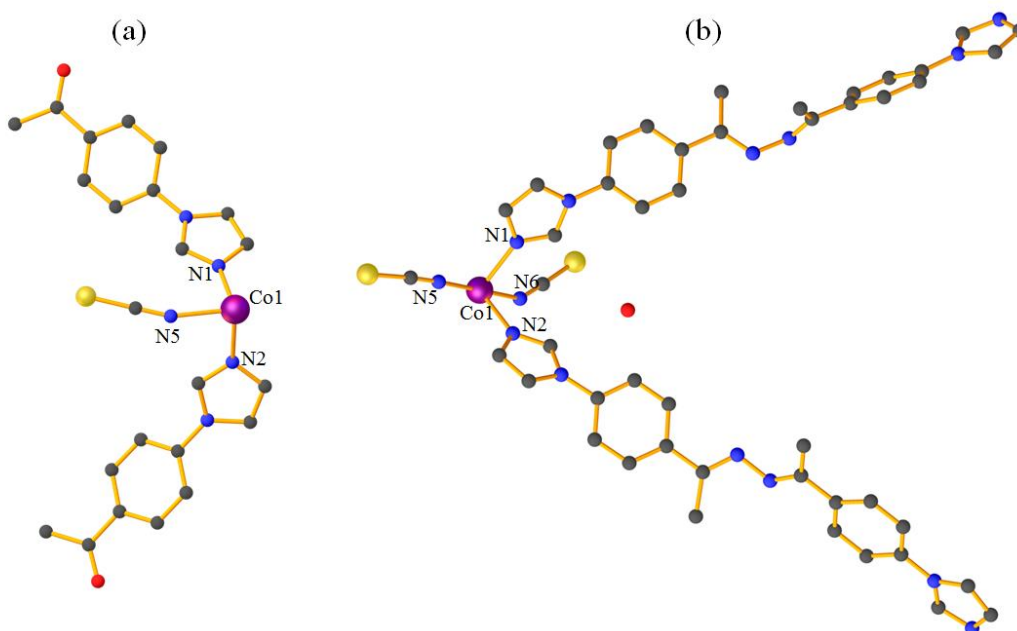

**Figure S1.** Asymmetric unit of complexes **1** and (b) **2**. Colour code C, gray; N, blue; O, red; Co, purple; S, yellow.

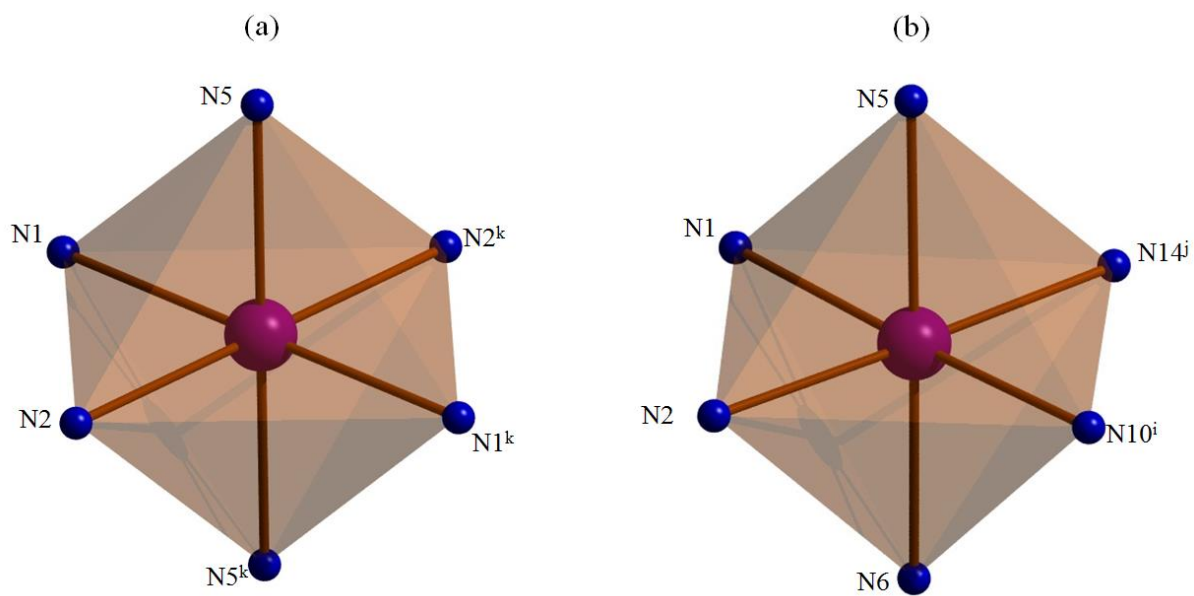

**Figure S2.** (a) Distorted octahedral coordination geometry around the  $\text{Co}^{\text{II}}$  in **1** and (b) **2**. Colour code N, blue; Co, purple. ( $i = 2-x, -3/2+y, 3/2-z$ ,  $j = 1-x, -3/2+y, 1/2-z$ ,  $k = 1-x, 2-y, 1-z$ ).

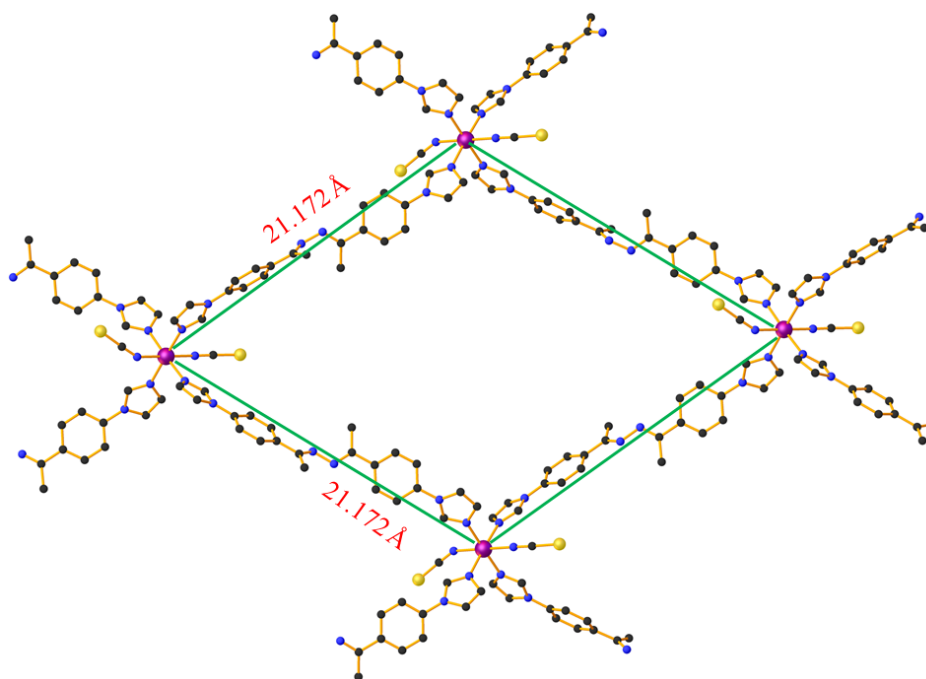

**Figure S3.** [4+4] metallocyclic unit formed in complex **2**.

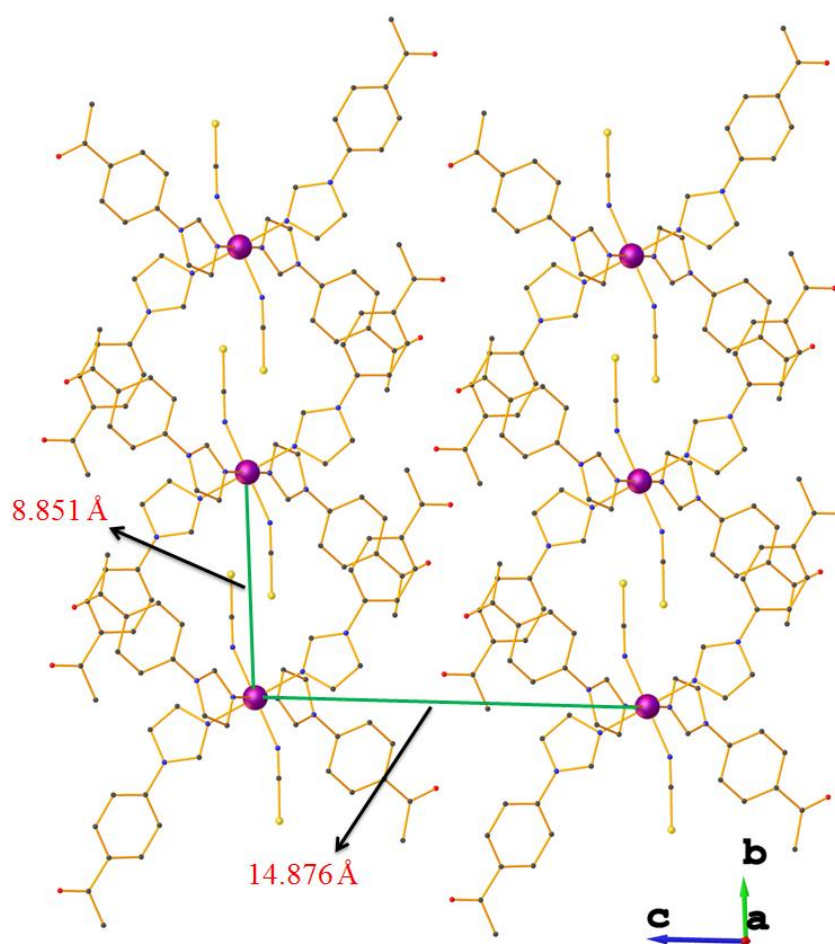

**Figure S4.** Distance between the Co<sup>II</sup> centres in 3D packed structure of complex **1**.

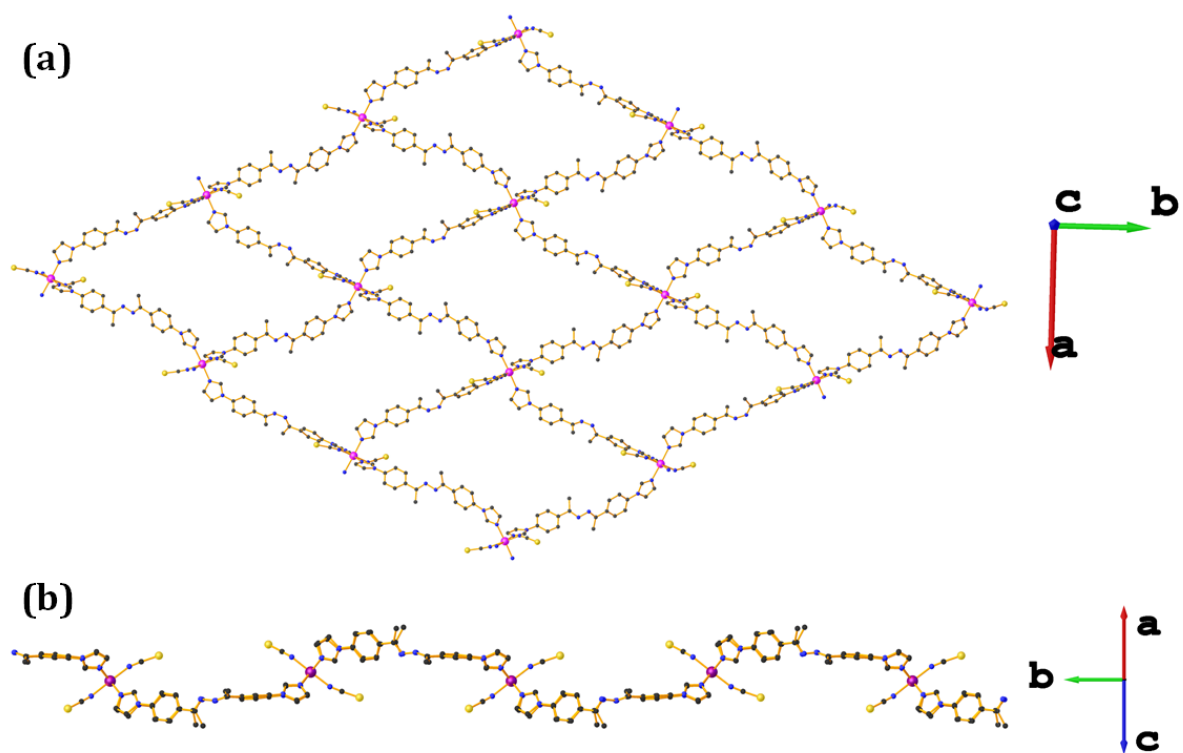

**Figure S5.** (a) Extended 2D sheet of complex **2** along *ab* plane and (b) along *b* axis.

**Table S2.** Bond distances (Å) around Co<sup>II</sup> centres in complexes **1** and **2**

| Complex 1          |           | Complex 2           |          |
|--------------------|-----------|---------------------|----------|
| Co1N1              | 2.164(11) | Co1N1               | 2.123(3) |
| Co1N1 <sup>k</sup> | 2.164(11) | Co1N2               | 2.143(3) |
| Co1N2              | 2.129(11) | Co1N5               | 2.122(3) |
| Co1N2 <sup>k</sup> | 2.129(11) | Co1N6               | 2.139(3) |
| Co1N5              | 2.132(11) | Co1N10 <sup>i</sup> | 2.163(3) |
| Co1N5 <sup>k</sup> | 2.132(11) | Co1N14 <sup>j</sup> | 2.148(3) |

$$i = 2-x, -3/2+y, 3/2-z, j = 1-x, -3/2+y, 1/2-z, k = 1-x, 2-y, 1-z$$

**Table S3.** Bond angles (°) around Co<sup>II</sup> centres in **1** and **2**

| Complex 1                          |           | Complex 2                            |            |
|------------------------------------|-----------|--------------------------------------|------------|
| N5Co1N5 <sup>k</sup>               | 180.0     | N1Co1N2                              | 91.5(11)   |
| N2 <sup>k</sup> Co1N1 <sup>k</sup> | 93.90(4)  | N1Co1N10 <sup>i</sup>                | 91.25(12)  |
| N2 <sup>k</sup> Co1N1              | 86.10(4)  | N1Co1N14 <sup>j</sup>                | 177.71(12) |
| N2Co1N1 <sup>k</sup>               | 86.10(4)  | N1Co1N6                              | 89.84(12)  |
| N2Co1N1                            | 93.90(4)  | N2Co1N10 <sup>i</sup>                | 177.14(12) |
| N2Co1N5                            | 88.65(4)  | N2Co1N14 <sup>j</sup>                | 90.62(12)  |
| N2 <sup>k</sup> Co1N5 <sup>k</sup> | 88.65(4)  | N5Co1N1                              | 90.94(12)  |
| N2 <sup>k</sup> Co1N5              | 91.35(4)  | N5Co1N2                              | 90.59(12)  |
| N2Co1N5 <sup>k</sup>               | 91.35(4)  | N5Co1N10 <sup>i</sup>                | 88.61(12)  |
| N1Co1N1 <sup>k</sup>               | 180.0     | N5Co1N14 <sup>j</sup>                | 89.90(12)  |
| N5 <sup>k</sup> Co1N1              | 89.17(4)  | N5Co1N6                              | 178.91(13) |
| N5Co1N1 <sup>k</sup>               | 89.17(4)  | N14 <sup>j</sup> Co1N10 <sup>i</sup> | 86.64(12)  |
| N5 <sup>k</sup> Co1N1 <sup>k</sup> | 90.83(4)  | N6Co1N2                              | 90.16(12)  |
| N5Co1N1                            | 90.83(4)  | N6Co1N10 <sup>i</sup>                | 90.61(12)  |
| N5Co1N5 <sup>k</sup>               | 180.00(6) | N6Co1N14 <sup>j</sup>                | 89.29(12)  |

$i = 2-x, -3/2+y, 3/2-z, j = 1-x, -3/2+y, 1/2-z, k = 1-x, 2-y, 1-z$

**Table S4. Shape Analysis**

|        |                   |                               |
|--------|-------------------|-------------------------------|
| HP-6   | 1 D <sub>6h</sub> | Hexagon                       |
| PPY-6  | 2 C <sub>5v</sub> | Pentagonal pyramid            |
| OC-6   | 3 O <sub>h</sub>  | Octahedron                    |
| TPR-6  | 4 D <sub>3h</sub> | Trigonal prism                |
| JPPY-6 | 5 C <sub>5v</sub> | Johnson pentagonal pyramid J2 |

| Structure [ML <sub>6</sub> ] | HP-6   | PPY-6  | <b>OC-6</b>  | TPR-6  | JPPY-6 |
|------------------------------|--------|--------|--------------|--------|--------|
| <b>Complex 1</b>             | 31.742 | 29.592 | <b>0.099</b> | 16.132 | 32.992 |
| <b>Complex 2</b>             | 32.804 | 29.548 | <b>0.038</b> | 16.129 | 33.200 |

Highlighted red colour shows the actual geometry of the metal centre with minimum distortion.

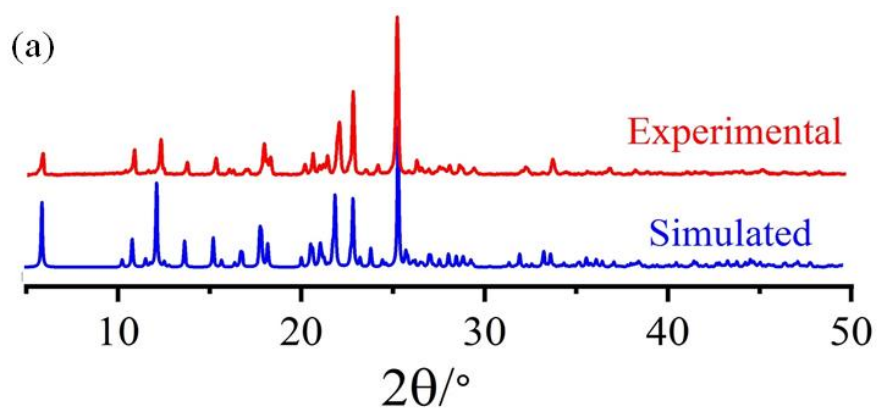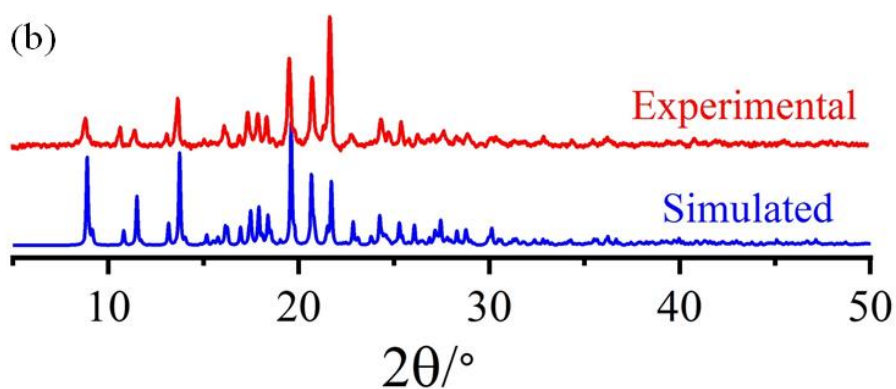

**Figure S6.** (a) Experimental and simulated PXRD patterns of complexes **1** and (b) **2**.

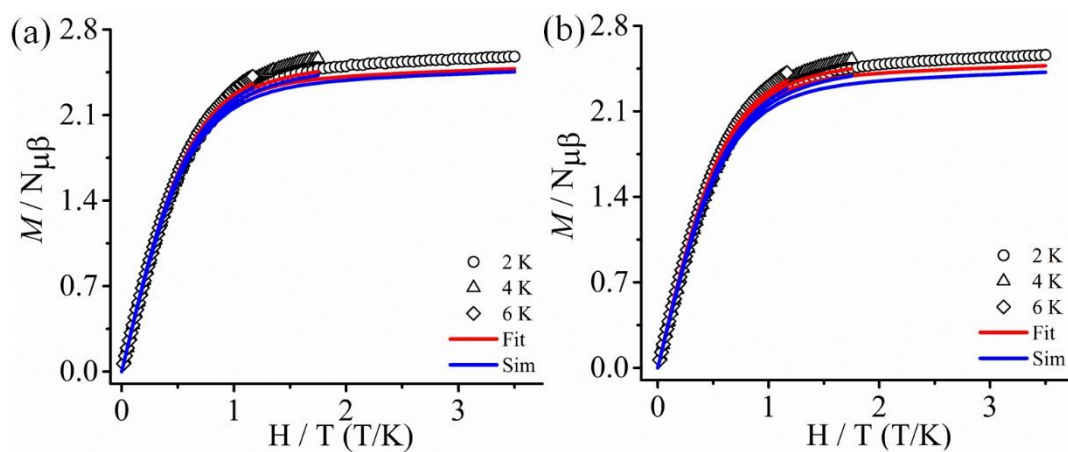

**Figure S7.**  $M/N_{\mu B}$  vs.  $H/T$  plots at the indicated temperatures for complexes **1-2** (a-b). The red lines are the best fit and blue lines are the best simulation using spin Hamiltonian and T-P isomorphism respectively.

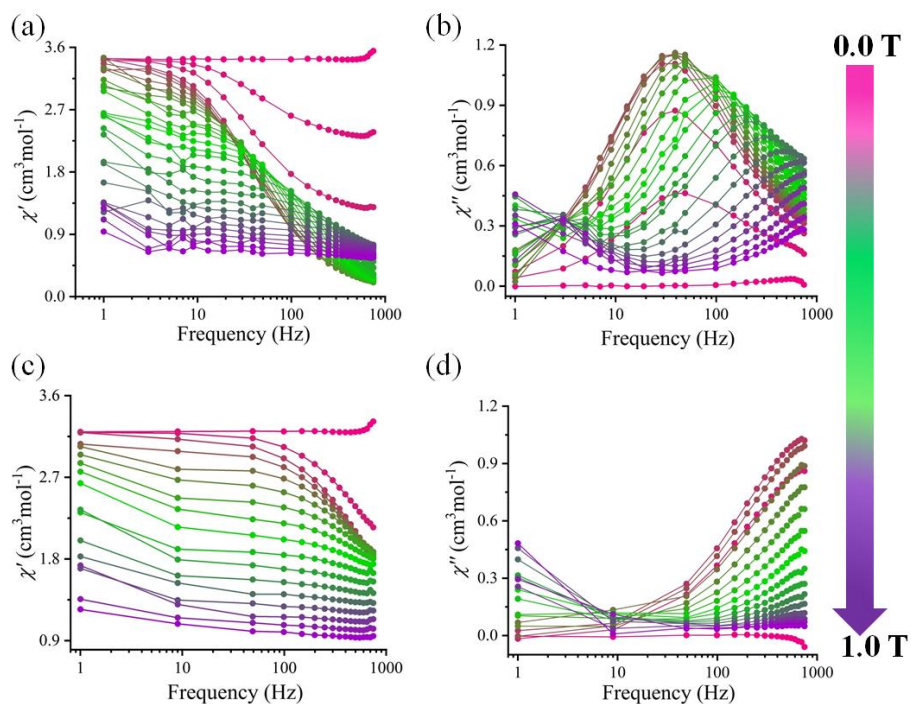

**Figure S8.** (a) Frequency dependency of the in-phase ( $\chi_M'$ ) and (b) out-of-phase ( $\chi_M''$ ) AC magnetic susceptibility plot under different external magnetic fields for complex **1**. (c) Frequency dependency of the in-phase ( $\chi_M'$ ) and (d) out-of-phase ( $\chi_M''$ ) AC magnetic susceptibility plot under different external magnetic fields for complex **2**.

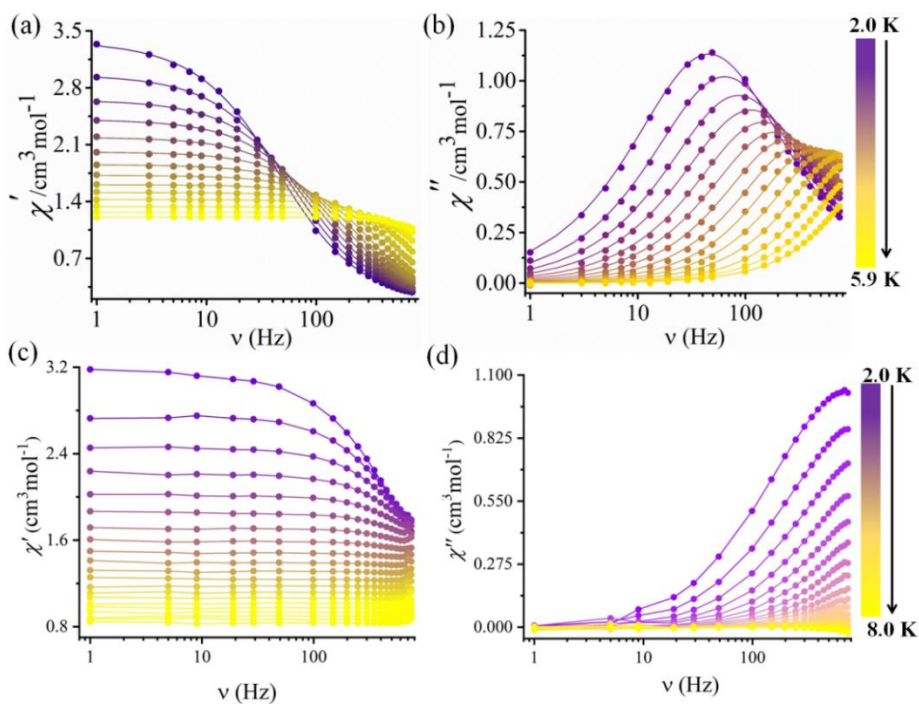

**Figure S9.** (a) Frequency dependency of the in-phase ( $\chi_M'$ ) and (b) out-of-phase ( $\chi_M''$ ) AC magnetic susceptibility plots for complex **1** and (c), (d) for complex **2** under 0.15 T dc field respectively.

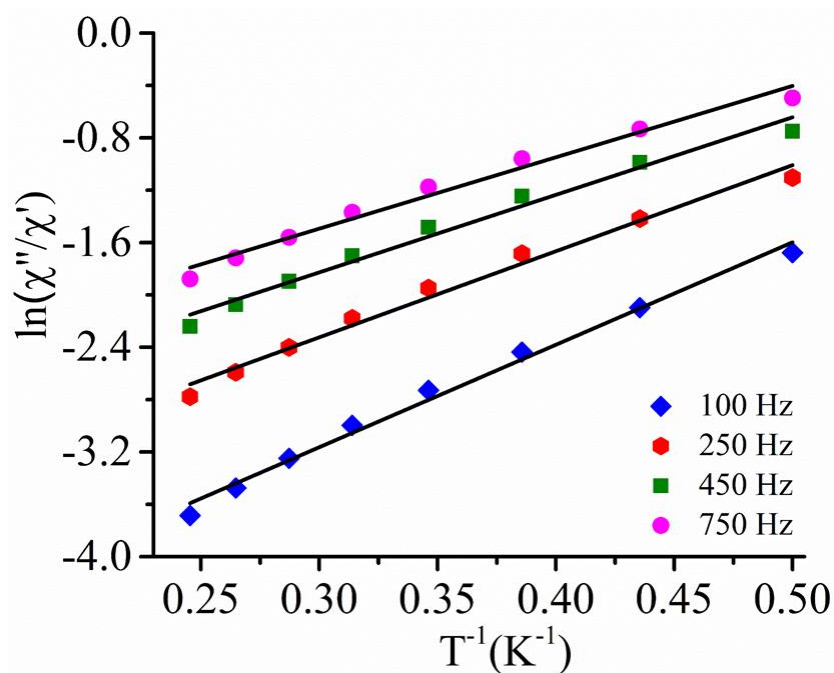

**Figure S10.** The solid lines represent the best fitting (c)  $\ln(\chi''/\chi')$  vs  $1/T$  plot and fitting (solid line) with Debye equation for complex **2**.

**Table S5.** The parameters obtained from the fitting of frequency dependency data using generalized Debye model for complex **1**

| T (K) | $\chi_T$ | $\tau$ (s) | $\chi_s$ | $\alpha$ |
|-------|----------|------------|----------|----------|
| 2     | 3.38718  | 0.00348    | 0.10393  | 0.23158  |
| 2.3   | 2.97056  | 0.00249    | 0.10452  | 0.21241  |
| 2.6   | 2.6562   | 0.00185    | 0.09875  | 0.20106  |
| 2.9   | 2.41363  | 0.00141    | 0.09376  | 0.19101  |
| 3.2   | 2.19418  | 0.00109    | 0.09969  | 0.17325  |
| 3.5   | 2.01235  | 8.42788E-4 | 0.10137  | 0.15585  |
| 3.8   | 1.8542   | 6.45135E-4 | 0.09363  | 0.13642  |
| 4.1   | 1.72225  | 4.93526E-4 | 0.09425  | 0.11408  |
| 4.4   | 1.60677  | 3.70565E-4 | 0.08977  | 0.08958  |
| 4.7   | 1.51182  | 2.70985E-4 | 0.06704  | 0.07361  |
| 5     | 1.42408  | 1.91639E-4 | 0.01779  | 0.06065  |
| 5.3   | 1.33657  | 1.4582E-4  | 0.05883  | 0.01893  |
| 5.6   | 1.26919  | 1.01291E-4 | 0        | 0.01247  |
| 5.9   | 1.20852  | 7.46636E-5 | 0        | 0.01034  |

**Table S6.** ORCA/CASSCF, ORCA/CASSCF+NEVPT2 computed  $D$ ,  $|E|$  and  $g_{iso}$  values for the complexes **1-2**. (a = ORCA/CASSCF/NEVPT2)

| Complex  | $D_{\text{expt}}$ ( $\text{cm}^{-1}$ ) | $D_{\text{cal}}$ ( $\text{cm}^{-1}$ ) | $E_{\text{exp}}$ ( $\text{cm}^{-1}$ ) | $E_{\text{cal}}$ ( $\text{cm}^{-1}$ ) | Exp. ( $g_x, g_y, g_z$ ) | $g_{\text{cal}}$ |
|----------|----------------------------------------|---------------------------------------|---------------------------------------|---------------------------------------|--------------------------|------------------|
| <b>1</b> | +84.16                                 | +118.20                               | 0.07(2)                               | 11.82                                 | 2.28, 2.28, 2.21         | 2.35             |
| <b>2</b> | +89.30                                 | +135.06                               | 0.08(3)                               | 6.34                                  | 2.30, 2.30, 2.18         | 2.30             |



**Table S7.** NEVPT2 calculated transition energy and their contribution to *D*, *E* for complexes **1** and **2**

| Complex 1     |                            |                             |                             | Complex 2     |                            |                             |                             |
|---------------|----------------------------|-----------------------------|-----------------------------|---------------|----------------------------|-----------------------------|-----------------------------|
| Excited state | Energy (cm <sup>-1</sup> ) | Cont. D (cm <sup>-1</sup> ) | Cont. E (cm <sup>-1</sup> ) | Excited state | Energy (cm <sup>-1</sup> ) | Cont. D (cm <sup>-1</sup> ) | Cont. E (cm <sup>-1</sup> ) |
| 1             | 315.9                      | 53.306                      | 52.356                      | 1             | 223.2                      | 56.467                      | 55.728                      |
| 2             | 560.5                      | 39.635                      | -38.060                     | 2             | 375.2                      | 48.964                      | -47.777                     |
| 3             | 8325.6                     | -0.421                      | 0.975                       | 3             | 8129.0                     | 2.617                       | 0.275                       |
| 4             | 9461.8                     | 0.968                       | -0.150                      | 4             | 9141.9                     | 2.211                       | -1.491                      |
| 5             | 9501.7                     | 4.331                       | -1.720                      | 5             | 9661.2                     | 3.458                       | 0.730                       |

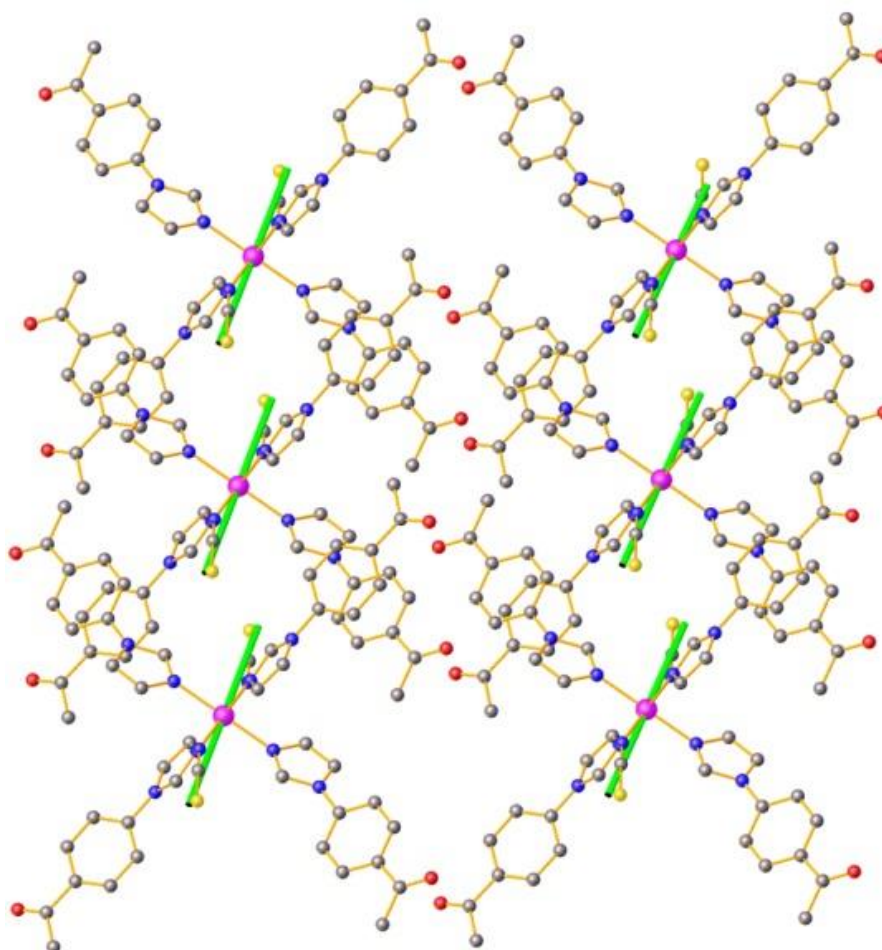

**Figure S11.** Orientation of ground state anisotropy axis in 3D packed structure of **1**.
